# Supplementary material for: Short- and long-term memory of moving amoeboid cells
Source: PubMed Central journal article supplement (PMC7877599; doi:10.1371/journal.pone.0246345), 2021-02-11
Supplement: pone.0246345.s004.pdf [file pone.0246345.s004.pdf]

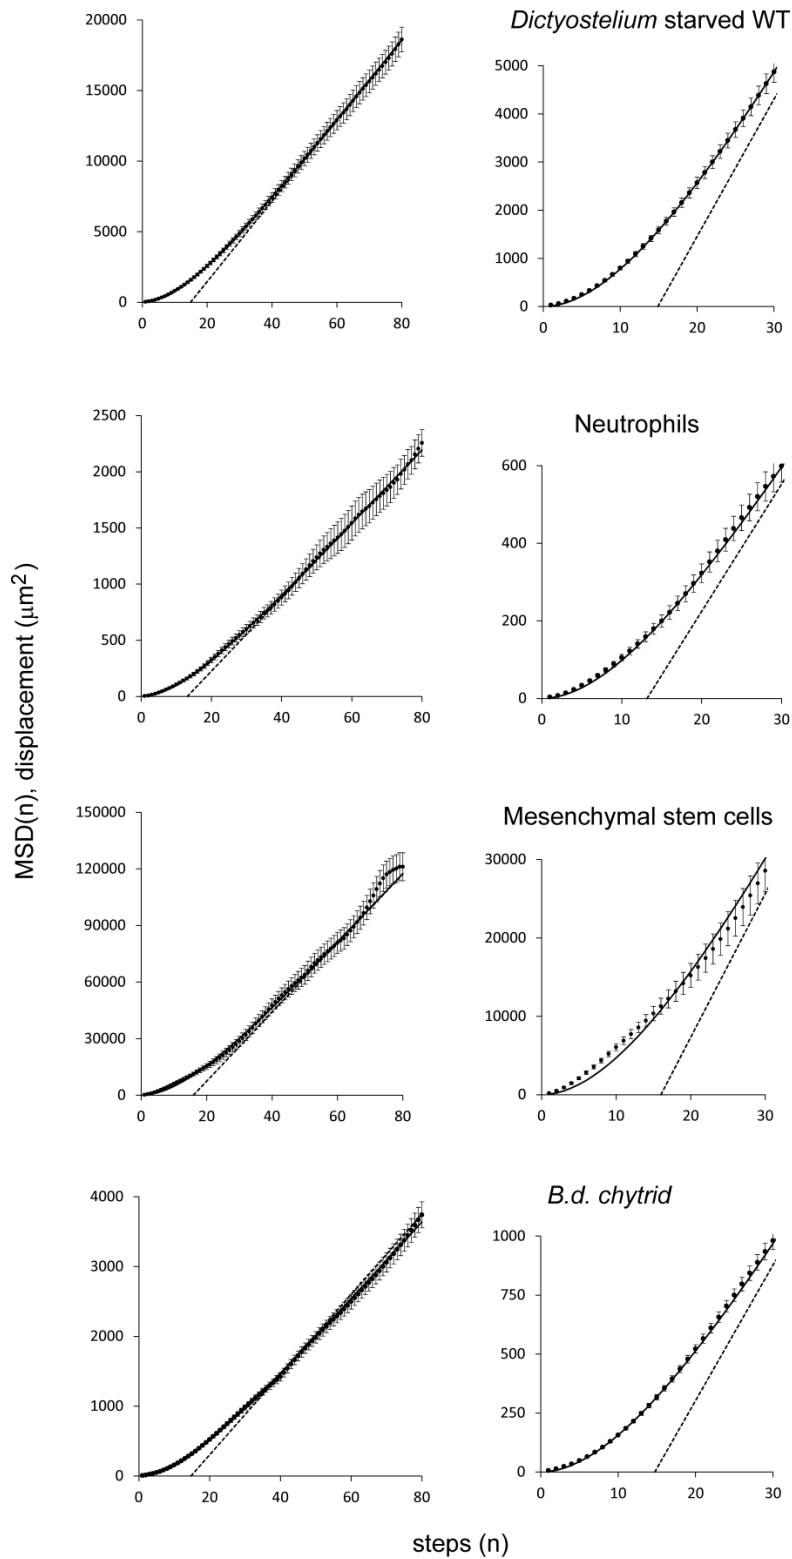

**Figure S4. Persistence; part 1 of 3. Dictyostelium starved wild-type and three other species.**

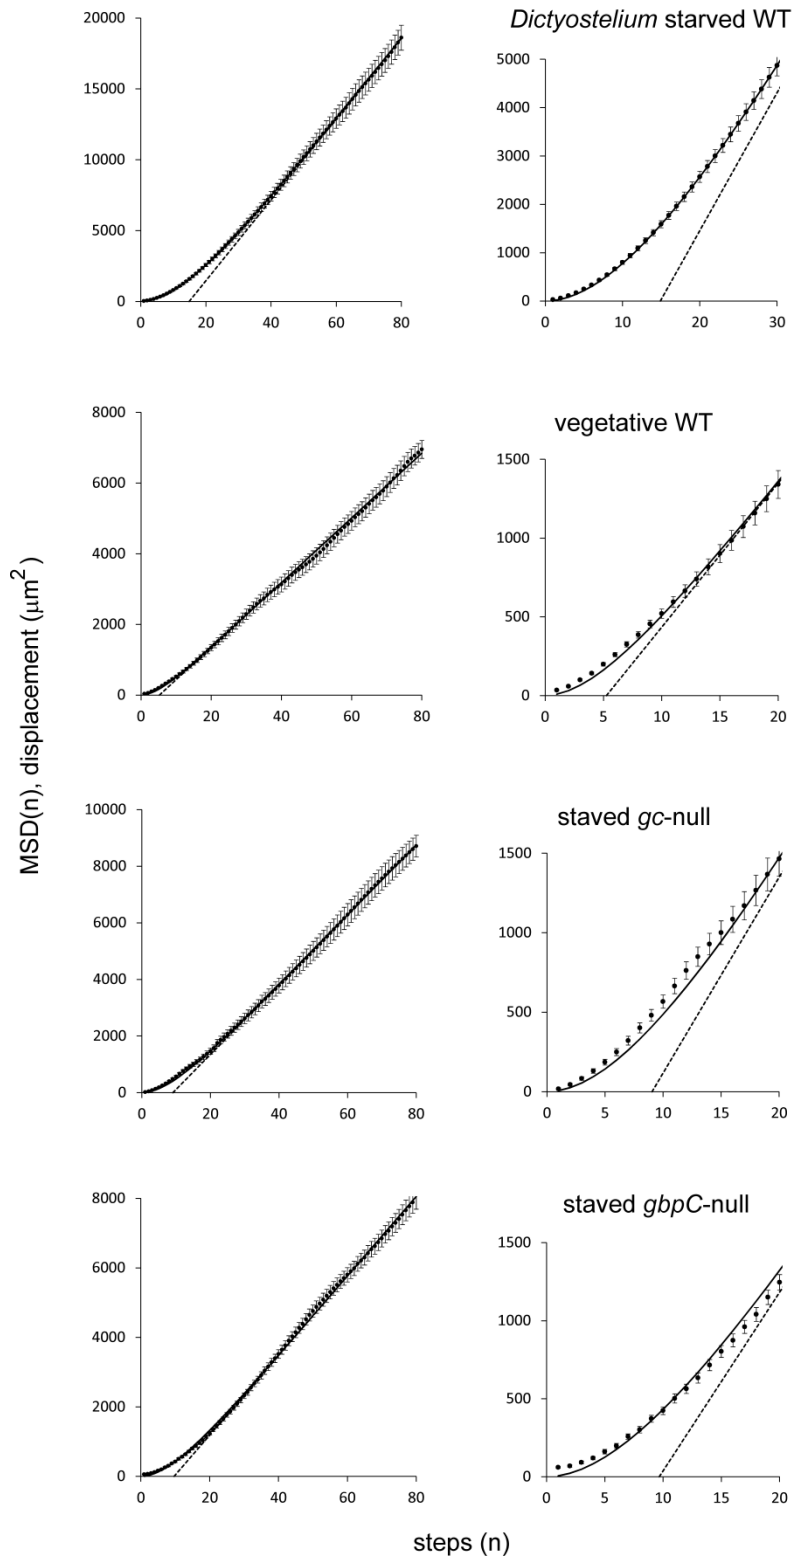

**Figure S4. Persistence; part 2 of 3. *Dictyostelium* starved wild-type, vegetative cells and mutants.**

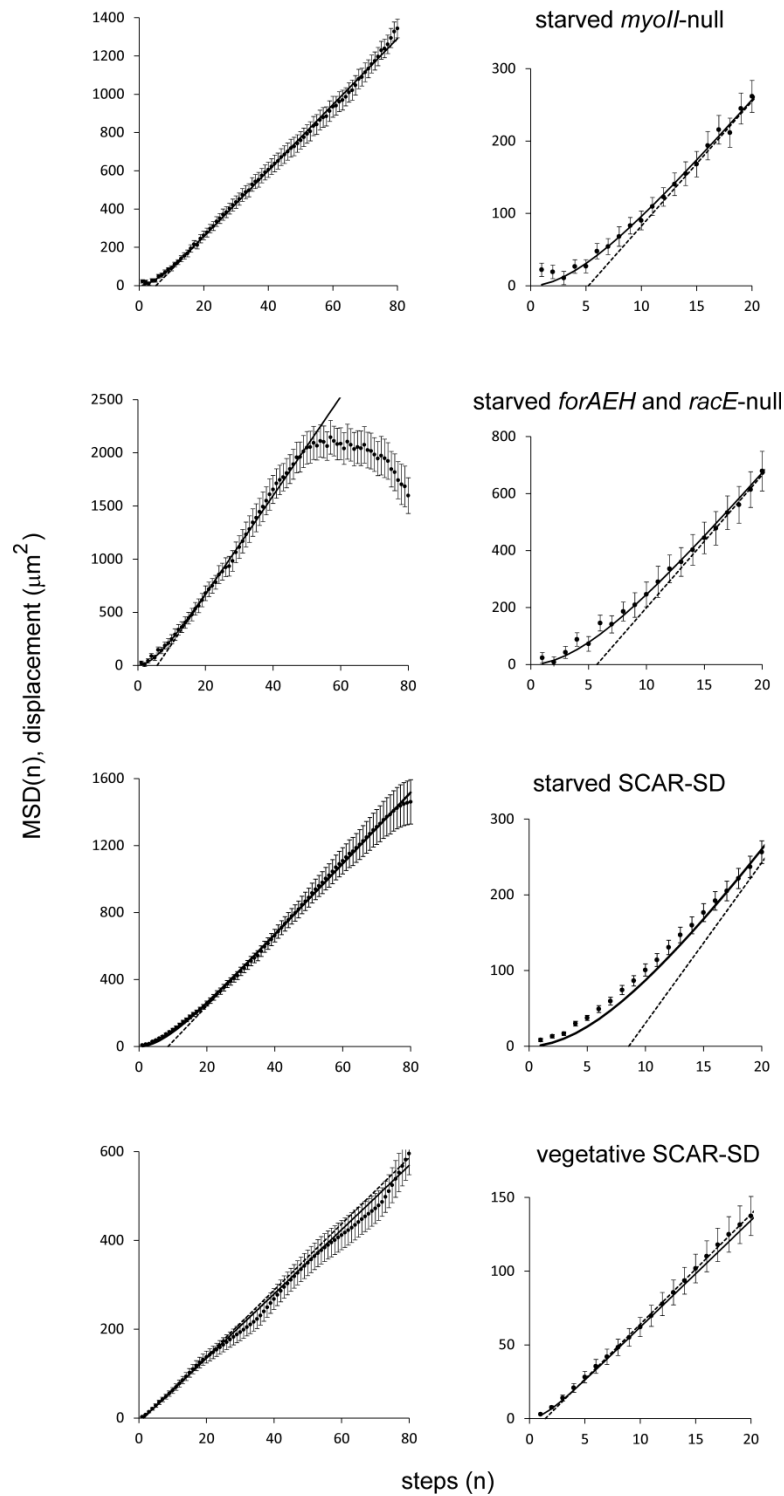

**Figure S4. Persistence; part 3 of 3.** Figures show the MSD as function of  $n$ , the number of steps. The data are the means and 95% CI. The solid line is the optimal fit using equation (1), yielding estimates for the step size  $\lambda$  and the persistence  $P$  (see table 1 and table S1). The dashed line is the asymptote for large  $n$ ; the intersection with the x-axis is the persistence  $P$ . For mesenchymal stem cells data up to  $n=70$  and for *forAEH/RacE* cells data up to  $n=50$  were used for the fit.
