# Supplementary material for: Short- and long-term memory of moving amoeboid cells
Source: PubMed Central journal article supplement (PMC7877599; doi:10.1371/journal.pone.0246345), 2021-02-11
Supplement: pone.0246345.s006.pdf [file pone.0246345.s006.pdf]

**Table S1. Persistence data.**

| strain                     | primary pseudopod data |        |              |        | mean square displacement (MSD)     |        |          |        | calculated    |        |
|----------------------------|------------------------|--------|--------------|--------|------------------------------------|--------|----------|--------|---------------|--------|
|                            | size ( $\mu\text{m}$ ) |        | interval (s) |        | $\lambda$ , step ( $\mu\text{m}$ ) |        | P, steps |        | P, time (min) |        |
|                            | mean                   | 95% CI | mean         | 95% CI | opt. fit                           | 95% CI | opt. fit | 95% CI | mean          | 95% CI |
| Starved WT                 | 5.37                   | 0.13   | 15.42        | 0.71   | 3.09                               | 0.09   | 14.90    | 0.96   | 3.83          | 0.30   |
| Vegetative WT              | 4.90                   | 0.18   | 16.89        | 1.39   | 2.83                               | 0.49   | 5.72     | 1.64   | 1.61          | 0.48   |
| Starved <i>gc</i> -null    | 4.64                   | 0.23   | 11.17        | 1.19   | 2.61                               | 0.36   | 9.05     | 1.88   | 1.68          | 0.39   |
| Starved <i>gbpC</i> -null  | 5.02                   | 0.27   | 9.46         | 1.13   | 2.43                               | 0.18   | 9.68     | 1.09   | 1.53          | 0.25   |
| Starved <i>myoII</i> -null | 5.02                   | 0.22   | 14.63        | 1.56   | 1.29                               | 0.30   | 5.21     | 1.85   | 1.27          | 0.47   |
| <i>forAEH/racE</i> -null   | 3.89                   | 0.24   | 5.87         | 1.09   | 2.02                               | 0.47   | 5.72     | 2.18   | 0.56          | 0.24   |
| Starved Rap1G12V           | 3.06                   | 0.16   | 9.21         | 1.11   | n.d.                               | n.d.   | n.d.     | n.d.   | n.d.          | n.d.   |
| Starved SCAR-SD            | 2.86                   | 0.12   | 8.70         | 1.87   | 1.11                               | 0.01   | 8.57     | 1.03   | 1.24          | 0.31   |
| Vegetative SCAR-SD         | 2.63                   | 0.28   | 6.42         | 1.02   | 1.61                               | 0.32   | 1.43     | 0.39   | 0.15          | 0.05   |
| Neutrophils                | 3.32                   | 0.21   | 7.86         | 1.07   | 1.12                               | 0.13   | 13.16    | 1.61   | 1.72          | 0.32   |
| Mesenchymal stem           | 13.80                  | 0.98   | 1289         | 206    | 7.56                               | 0.92   | 16.01    | 2.64   | 344           | 79     |
| B.d. chytrid               | 2.21                   | 0.13   | 7.26         | 0.77   | 1.40                               | 0.04   | 14.74    | 0.57   | 1.78          | 0.20   |

Primary pseudopod data are derived from Van Haastert (2020) PLoS One e0243442, or obtained here for SCAR-SD. The MSD data of figures S4 were used to estimate the step size  $\lambda$  in  $\mu\text{m}$  and the persistence P in steps; the 95% confidence interval (CI) was obtained by bootstrap analysis of the data. The Persistence in time is calculated using the pseudopod interval and the persistence in steps. Note the extreme large persistence time of 344 minutes for mesenchymal stem cells, which is due to the very large pseudopod interval (1289 seconds).
